# Supplementary material
Source: Royal Society of Chemistry journal article supplement (doi:10.1039/d5va00468c)
Supplement: d5va00468c1.pdf [file d5va00468c1.pdf]

## **Application of Recirculation Prehydrolysis Technology in Food Waste Pretreatment and Environmental Impact Analysis: A Case in Shanghai**

Table S1 Data analysis of resource recovery from recirculation experiments

| Item                                                                | Unit                | Non-recirculation | Recirculation ratio 20% | Recirculation ratio 30% |
|---------------------------------------------------------------------|---------------------|-------------------|-------------------------|-------------------------|
| Cumulative food waste received                                      | t                   | 16090.96          | 9258.12                 | 14715.75                |
| Cumulative feed volume to the anaerobic digestion system(AD system) | m <sup>3</sup>      | 13588             | 8857                    | 13820                   |
| Weighted average COD concentration of feed                          | mg/L                | 145097            | 109070                  | 112811                  |
| Total cumulative COD input to AD system                             | kg                  | 1971578           | 966033                  | 1559048                 |
| COD generation per ton of waste                                     | kg/t                | 123               | 104                     | 106                     |
| Cumulative effluent volume from AD system                           | m <sup>3</sup>      | 13169             | 8385                    | 13074                   |
| Weighted average COD concentration of effluent                      | mg/L                | 16977             | 14824                   | 16440                   |
| Total cumulative COD output from AD system                          | kg                  | 223570            | 124299                  | 214937                  |
| Total COD removal in AD system                                      | kg                  | 1748008           | 841734                  | 1344111                 |
| Biogas yield per unit COD consumed                                  | Nm <sup>3</sup> /kg | 0.59              | 0.74                    | 0.78                    |
| Cumulative biogas production                                        | Nm <sup>3</sup>     | 1036889           | 625314                  | 1052145                 |
| Average methane concentration in biogas                             | %                   | 60                | 65                      | 65                      |

Table S2 Input and output inventory of pretreatment unit

| Processing Unit               | Category | Parameter                       | Unit              | Phase I Project |
|-------------------------------|----------|---------------------------------|-------------------|-----------------|
| Collection and Transport Unit | Input    | Diesel                          | kg/t              | 1.64            |
|                               | Output   | NO <sub>x</sub>                 | kg/t              | 0.0140          |
|                               |          | CO                              | kg/t              | 0.0046          |
| Pretreatment Unit             | Input    | Electricity                     | Kwh/t             | 16.41           |
|                               |          | Water                           | kg/t              | 0.84            |
|                               | Output   | Crude grease                    | kg/t              | 18.44           |
|                               |          | Solid residue                   | kg/t              | 376.20          |
|                               |          | NH <sub>3</sub>                 | kg/t              | 0.441           |
|                               |          | H <sub>2</sub> S                | kg/t              | 0.024           |
| Anaerobic Digestion Unit      | Input    | Electricity                     | Kwh/t             | 4.36            |
|                               |          | Digestate liquid                | kg/t              | 844.50          |
|                               | Output   | Biogas                          | m <sup>3</sup> /t | 64.15           |
|                               |          | Digestate solids                | kg/t              | 28.36           |
|                               |          | Electricity                     | Kwh/t             | 1.22            |
| Biogas Purification Unit      | Input    | Na <sub>2</sub> CO <sub>3</sub> | kg/t              | 0.30            |
|                               |          | Urea                            | kg/t              | 0.19            |
|                               | Output   | Biogas power generation         | Kwh/t             | 122.86          |
|                               |          | NO <sub>x</sub>                 | kg/t              | 0.028           |
|                               |          | SO <sub>2</sub>                 | kg/t              | 0.00004         |
|                               |          | Flue dust                       | kg/t              | 0.00008         |
|                               |          | Electricity                     | Kwh/t             | 14.39           |
| Leachate Treatment Unit       | Input    | PAC                             | kg/t              | 0.13            |
|                               |          | PAM                             | kg/t              | 0.06            |
|                               |          | Sludge                          | kg/t              | 34.66           |
|                               | Output   | CH <sub>4</sub>                 | kg/t              | 0.004           |
|                               |          | N <sub>2</sub> O                | kg/t              | 0.06            |
|                               |          | COD                             | kg/t              | 0.40            |
|                               |          | BOD <sub>5</sub>                | kg/t              | 0.20            |
|                               |          | TN                              | kg/t              | 0.40            |
|                               |          | NH <sub>3</sub> -N              | kg/t              | 0.25            |
| Odor Removal Unit             | Input    | SS                              | kg/t              | 0.009           |
|                               |          | Electricity                     | Kwh/t             | 19.22           |
|                               |          | Deodorant                       | kg/t              | 0.37            |
|                               |          | Electricity                     | Kwh/t             | 8.60            |
|                               |          | Coal                            | kg/t              | 8.00            |
| Grease Recovery Unit          | Input    | Diesel                          | kg/t              | 3.00            |
|                               |          | Water                           | kg/t              | 10.00           |
|                               |          | Methanol                        | kg/t              | 7.50            |
|                               | Output   | H <sub>2</sub> SO <sub>4</sub>  | kg/t              | 0.75            |
|                               |          | NaOH                            | kg/t              | 0.062           |
|                               |          | Biodiesel                       | kg/t              | 40.00           |

|                         |        |                                   |       |        |
|-------------------------|--------|-----------------------------------|-------|--------|
|                         |        | SO <sub>2</sub>                   | kg/t  | 0.069  |
|                         |        | NH <sub>3</sub>                   | kg/t  | 0.120  |
|                         |        | H <sub>2</sub> S                  | kg/t  | 0.012  |
|                         |        | Flue dust                         | kg/t  | 0.016  |
|                         |        | Electricity                       | kwh/t | 23.89  |
|                         | Input  | Urea                              | kg    | 1.84   |
|                         |        | Ca(OH) <sub>2</sub>               | kg    | 4.51   |
|                         |        | Activated carbon                  | kg    | 0.20   |
| Impurity Treatment Unit |        | Incineration for power generation | kwh/t | 161.99 |
|                         | Output | NO <sub>x</sub>                   | kg    | 0.36   |
|                         |        | SO <sub>2</sub>                   | kg    | 0.46   |
|                         |        | Flue dust                         | kg    | 21.38  |
|                         |        | CO                                | kg    | 0.18   |

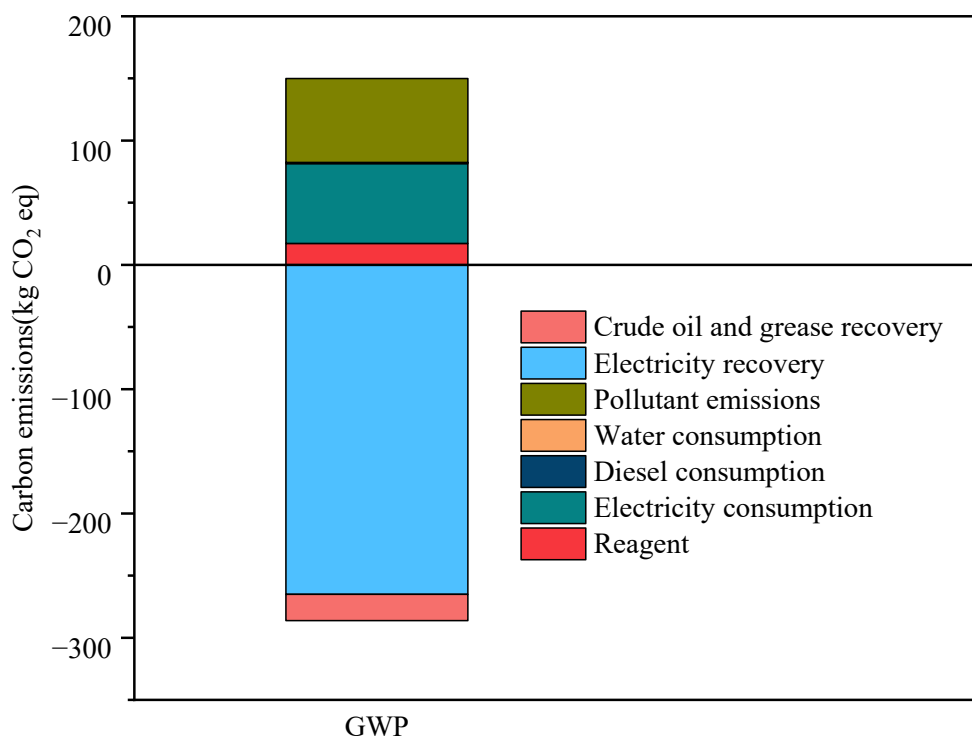

Fig. S1 Carbon footprint contributions of each unit in the system

Table S3 Characterization results of 18 indicators for each treatment unit in the life cycle

| Impact category                          | Unit                     | Deodorization unit | Collection and transportation unit | Anaerobic digestion unit | Oil recovery unit | Pretreatment unit | Biogas purification unit | Digestate treatment unit | Impurity incineration unit |
|------------------------------------------|--------------------------|--------------------|------------------------------------|--------------------------|-------------------|-------------------|--------------------------|--------------------------|----------------------------|
| Global warming                           | kg CO <sub>2</sub> eq    | 2.06E+01           | 9.37E-01                           | 3.72E+00                 | -7.52E+00         | 1.68E+01          | -9.11E+01                | 1.51E+01                 | -9.53E+01                  |
| Stratospheric ozone depletion            | kg CFC <sub>11</sub> eq  | 2.07E-05           | 5.06E-07                           | -1.30E-05                | -2.14E-07         | 1.66E-05          | -1.23E-04                | 1.48E-05                 | -1.32E-04                  |
| Ionizing radiation                       | kBq Co. <sub>60</sub> eq | 6.92E-01           | 2.87E-02                           | -3.34E-02                | -2.58E-01         | 4.43E-01          | -3.25E+00                | 4.13E-01                 | -2.61E+00                  |
| Ozone formation – human health           | kg NO <sub>x</sub> eq    | 7.14E-02           | 3.36E-02                           | 1.64E-02                 | -5.79E-02         | 5.88E-02          | -3.76E-01                | 1.77E-01                 | 2.77E-01                   |
| Fine particulate matter formation        | kg PM <sub>2.5</sub> eq  | 6.64E-02           | 7.15E-03                           | -7.08E-03                | 1.13E-01          | 3.68E-01          | -3.92E-01                | 7.17E-02                 | -8.71E-02                  |
| Ozone formation – terrestrial ecosystems | kg NO <sub>x</sub> eq    | 7.15E-02           | 6.54E-03                           | 1.65E-02                 | -7.68E-02         | 5.89E-02          | -4.33E-01                | 5.69E-02                 | -4.42E-01                  |
| Terrestrial acidification                | kg SO <sub>2</sub> eq    | 1.81E-01           | 3.70E-02                           | -1.23E-01                | 1.68E-01          | 4.29E-01          | -1.05E+00                | 1.72E-01                 | 3.12E-01                   |
| Freshwater eutrophication                | kg P eq                  | 3.74E-03           | 8.91E-05                           | 7.49E-05                 | 6.28E-04          | 2.68E-03          | -1.96E-02                | 2.53E-03                 | -1.81E-02                  |
| Marine eutrophication                    | kg N eq                  | 2.59E-04           | 1.30E-04                           | 2.31E-05                 | -2.79E-03         | 1.76E-04          | -1.03E-03                | 3.41E-01                 | -1.02E-03                  |
| Terrestrial ecotoxicity                  | kg 1,4-DCB               | 2.33E+01           | 3.25E+00                           | 1.06E+01                 | 1.98E+01          | 1.63E+01          | -1.17E+02                | 1.62E+01                 | -9.24E+01                  |
| Freshwater ecotoxicity                   | kg 1,4-DCB               | 6.19E-01           | 1.41E-02                           | 9.74E-02                 | 4.47E-01          | 4.95E-01          | -3.63E+00                | 4.59E-01                 | -3.68E+00                  |
| Marine ecotoxicity                       | kg 1,4-DCB               | 2.39E+03           | 1.37E+02                           | 4.85E+01                 | -2.58E+02         | 1.69E+03          | -1.23E+04                | 1.60E+03                 | -1.16E+04                  |

|                                 |                          |          |          |           |           |          |           |          |           |
|---------------------------------|--------------------------|----------|----------|-----------|-----------|----------|-----------|----------|-----------|
| Human carcinogenic toxicity     | kg 1,4-DCB               | 2.59E+01 | 3.75E+00 | 2.89E+00  | -5.13E+01 | 1.90E+01 | -1.37E+02 | 2.64E+01 | -1.16E+02 |
| Human non-carcinogenic toxicity | kg 1,4-DCB               | 1.99E+03 | 1.08E+02 | 3.33E-01  | -5.75E+01 | 1.38E+03 | -1.01E+04 | 1.30E+03 | -9.38E+03 |
| Land use                        | m <sup>2</sup> a crop eq | 2.35E-01 | 3.83E-02 | 8.37E-03  | -6.69E-01 | 1.79E-01 | -1.31E+00 | 1.64E-01 | -1.27E+00 |
| Mineral resource scarcity       | kg Cu eq                 | 1.50E-02 | 2.73E-03 | -9.52E-04 | -1.31E-02 | 9.76E-03 | -6.94E-02 | 1.76E-02 | -5.03E-02 |
| Fossil resource scarcity        | kg oil eq                | 4.26E+00 | 1.97E+00 | 8.33E-01  | -3.36E+01 | 3.41E+00 | -2.50E+01 | 3.13E+00 | -2.58E+01 |
| Water consumption               | m <sup>3</sup>           | 1.30E-01 | 4.95E-03 | 1.86E-02  | -1.47E-02 | 8.69E-02 | -6.15E-01 | 7.99E-02 | -4.09E-01 |

Table S4 Normalized results of 18 indicators for each treatment unit in the life cycle

| Impact category                          | Deodorization unit | Collection and transportation unit | Anaerobic digestion unit | Oil recovery unit | Pretreatment unit | Biogas purification unit | Digestate treatment unit | Impurity incineration unit |
|------------------------------------------|--------------------|------------------------------------|--------------------------|-------------------|-------------------|--------------------------|--------------------------|----------------------------|
| Global warming                           | 3.55E-03           | 1.61E-04                           | 6.39E-04                 | -1.29E-03         | 2.88E-03          | -1.57E-02                | 2.60E-03                 | -1.64E-02                  |
| Stratospheric ozone depletion            | 2.93E-04           | 7.19E-06                           | -1.85E-04                | -3.04E-06         | 2.36E-04          | -1.75E-03                | 2.10E-04                 | -1.87E-03                  |
| Ionizing radiation                       | 9.89E-04           | 4.11E-05                           | -4.78E-05                | -3.69E-04         | 6.33E-04          | -4.65E-03                | 5.91E-04                 | -3.73E-03                  |
| Ozone formation – human health           | 3.47E-03           | 1.63E-03                           | 7.98E-04                 | -2.81E-03         | 2.86E-03          | -1.83E-02                | 8.59E-03                 | 1.35E-02                   |
| Fine particulate matter formation        | 2.60E-03           | 2.80E-04                           | -2.77E-04                | 4.40E-03          | 1.44E-02          | -1.53E-02                | 2.80E-03                 | -3.41E-03                  |
| Ozone formation – terrestrial ecosystems | 4.03E-03           | 3.68E-04                           | 9.31E-04                 | -4.33E-03         | 3.32E-03          | -2.44E-02                | 3.21E-03                 | -2.49E-02                  |
| Terrestrial acidification                | 4.42E-03           | 9.02E-04                           | -3.00E-03                | 4.11E-03          | 1.05E-02          | -2.57E-02                | 4.20E-03                 | 7.62E-03                   |
| Freshwater eutrophication                | 5.76E-03           | 1.37E-04                           | 1.15E-04                 | 9.68E-04          | 4.13E-03          | -3.02E-02                | 3.90E-03                 | -2.78E-02                  |

| Impact category                 | Deodorization unit | Collection and transportation unit | Anaerobic digestion unit | Oil recovery unit | Pretreatment unit | Biogas purification unit | Digestate treatment unit | Impurity incineration unit |
|---------------------------------|--------------------|------------------------------------|--------------------------|-------------------|-------------------|--------------------------|--------------------------|----------------------------|
| Marine eutrophication           | 5.63E-05           | 2.83E-05                           | 5.00E-06                 | -6.05E-04         | 3.83E-05          | -2.23E-04                | 7.39E-02                 | -2.20E-04                  |
| Terrestrial ecotoxicity         | 1.43E-03           | 1.99E-04                           | 6.49E-04                 | 1.21E-03          | 9.96E-04          | -7.14E-03                | 9.90E-04                 | -5.65E-03                  |
| Freshwater ecotoxicity          | 2.13E-03           | 4.86E-05                           | 3.35E-04                 | 1.54E-03          | 1.70E-03          | -1.25E-02                | 1.58E-03                 | -1.27E-02                  |
| Marine ecotoxicity              | 9.71E-04           | 5.55E-05                           | 1.97E-05                 | -1.05E-04         | 6.84E-04          | -4.99E-03                | 6.51E-04                 | -4.69E-03                  |
| Human carcinogenic toxicity     | 8.78E-02           | 1.27E-02                           | 9.80E-03                 | -1.74E-01         | 6.44E-02          | -4.66E-01                | 8.93E-02                 | -3.95E-01                  |
| Human non-carcinogenic toxicity | 8.93E-04           | 4.88E-05                           | 1.50E-07                 | -2.59E-05         | 6.21E-04          | -4.53E-03                | 5.85E-04                 | -4.22E-03                  |
| Land use                        | 3.81E-05           | 6.20E-06                           | 1.36E-06                 | -1.08E-04         | 2.90E-05          | -2.12E-04                | 2.66E-05                 | -2.05E-04                  |
| Mineral resource scarcity       | 1.25E-07           | 2.27E-08                           | -7.93E-09                | -1.09E-07         | 8.13E-08          | -5.78E-07                | 1.47E-07                 | -4.19E-07                  |
| Fossil resource scarcity        | 4.34E-03           | 2.01E-03                           | 8.50E-04                 | -3.43E-02         | 3.48E-03          | -2.55E-02                | 3.20E-03                 | -2.63E-02                  |
| Water consumption               | 4.87E-04           | 1.86E-05                           | 6.96E-05                 | -5.50E-05         | 3.26E-04          | -2.31E-03                | 3.00E-04                 | -1.53E-03                  |



Table S5 Input and output inventory of three cases

| Category | Parameter                              | Unit  | Phase I project | Phase I project with 30%<br>recirculation | Phase II project |
|----------|----------------------------------------|-------|-----------------|-------------------------------------------|------------------|
| Input    | Food waste                             | t     | 1.00            | 1.00                                      | 1.00             |
|          | Diesel                                 | kg/t  | 4.64            | 4.35                                      | 4.87             |
|          | Electricity                            | Kwh/t | 88.09           | 86.72                                     | 92.20            |
|          | Water                                  | kg/t  | 10.84           | 11.04                                     | 15.22            |
|          | PAC                                    | kg/t  | 0.13            | 0.14                                      | 0.10             |
|          | PAM                                    | kg/t  | 0.06            | 0.01                                      | 0.01             |
|          | Na <sub>2</sub> CO <sub>3</sub>        | kg/t  | 0.30            | 0.25                                      | 0.12             |
|          | Urea                                   | kg/t  | 2.03            | 1.89                                      | 2.03             |
|          | Deodorant                              | kg/t  | 0.37            | 0.32                                      | 0.19             |
|          | Methanol                               | kg/t  | 7.50            | 7.84                                      | 10.72            |
|          | NaOH                                   | kg/t  | 0.06            | 0.07                                      | 0.09             |
|          | H <sub>2</sub> SO <sub>4</sub>         | kg/t  | 0.75            | 0.78                                      | 1.08             |
|          | Ca(OH) <sub>2</sub>                    | kg/t  | 4.51            | 4.32                                      | 4.46             |
|          | Activated carbon                       | kg/t  | 0.20            | 0.19                                      | 0.21             |
|          | Biogas power generation                | Kwh/t | 122.86          | 125.01                                    | 156.71           |
|          | Biodiesel                              | kg/t  | 40.00           | 41.80                                     | 57.72            |
| Output   | Impurity incineration power generation | Kwh/t | 161.99          | 155.92                                    | 163.20           |
|          | CH <sub>4</sub>                        | kg/t  | 0.0040          | 0.0037                                    | 0.0038           |
|          | N <sub>2</sub> O                       | kg/t  | 0.06            | 0.06                                      | 0.06             |
|          | NO <sub>x</sub>                        | kg/t  | 0.41            | 0.39                                      | 0.40             |
|          | SO <sub>2</sub>                        | kg/t  | 0.53            | 0.51                                      | 0.57             |
|          | CO                                     | kg/t  | 0.18            | 0.17                                      | 0.18             |
|          | NH <sub>3</sub>                        | kg/t  | 0.56            | 0.53                                      | 0.59             |

| Category | Parameter          | Unit | Phase I project | Phase I project with 30% recirculation | Phase II project |
|----------|--------------------|------|-----------------|----------------------------------------|------------------|
|          | H <sub>2</sub> S   | kg/t | 0.04            | 0.04                                   | 0.04             |
|          | Flue dust          | kg/t | 21.40           | 20.53                                  | 21.85            |
|          | COD                | kg/t | 0.40            | 0.36                                   | 0.37             |
|          | BOD <sub>5</sub>   | kg/t | 0.20            | 0.18                                   | 0.19             |
|          | TN                 | kg/t | 0.40            | 0.36                                   | 0.37             |
|          | NH <sub>3</sub> -N | kg/t | 0.25            | 0.23                                   | 0.24             |
|          | SS                 | kg/t | 0.01            | 0.01                                   | 0.01             |

Table S6 Characterization and normalization results of the three scenarios

| Impact categories                       | Characterization results |                                           |                  | Normalized results |                                           |                  |
|-----------------------------------------|--------------------------|-------------------------------------------|------------------|--------------------|-------------------------------------------|------------------|
|                                         | Phase I project          | Phase I project with<br>30% recirculation | Phase II project | Phase I project    | Phase I project with<br>30% recirculation | Phase II project |
| Global warming                          | -2.04E+02                | -2.03E+02                                 | -2.44E+02        | -3.51E-02          | -3.49E-02                                 | -4.20E-02        |
| Stratospheric ozone depletion           | -1.99E-04                | -1.97E-04                                 | -2.35E-04        | -2.82E-03          | -2.80E-03                                 | -3.34E-03        |
| Ionizing radiation                      | -4.42E+00                | -4.46E+00                                 | -5.62E+00        | -6.33E-03          | -6.38E-03                                 | -8.03E-03        |
| Ozone formation, human health           | 2.15E-01                 | 1.76E-01                                  | 3.85E-02         | 1.05E-02           | 8.54E-03                                  | 1.87E-03         |
| Fine particulate matter formation       | 1.63E-01                 | 1.30E-01                                  | 7.82E-02         | 6.38E-03           | 5.08E-03                                  | 3.06E-03         |
| Ozone formation, terrestrial ecosystems | -7.43E-01                | -7.43E-01                                 | -9.09E-01        | -4.18E-02          | -4.19E-02                                 | -5.12E-02        |
| Terrestrial acidification               | 3.06E-01                 | 2.25E-01                                  | 3.03E-02         | 7.47E-03           | 5.48E-03                                  | 7.38E-04         |
| Freshwater eutrophication               | -2.30E-02                | -2.34E-02                                 | -2.92E-02        | -3.54E-02          | -3.61E-02                                 | -4.50E-02        |
| Marine eutrophication                   | 9.72E-02                 | 8.82E-02                                  | 9.02E-02         | 2.11E-02           | 1.91E-02                                  | 1.96E-02         |
| Terrestrial ecotoxicity                 | -1.26E+02                | -1.28E+02                                 | -1.59E+02        | -7.70E-03          | -7.82E-03                                 | -9.71E-03        |
| Freshwater ecotoxicity                  | -5.15E+00                | -5.10E+00                                 | -6.05E+00        | -1.77E-02          | -1.76E-02                                 | -2.08E-02        |
| Marine ecotoxicity                      | -1.79E+04                | -1.79E+04                                 | -2.20E+04        | -7.25E-03          | -7.27E-03                                 | -8.92E-03        |
| Human carcinogenic toxicity             | -2.25E+02                | -2.29E+02                                 | -2.96E+02        | -7.63E-01          | -7.75E-01                                 | -1.00E+00        |
| Human non-carcinogenic toxicity         | -1.44E+04                | -1.44E+04                                 | -1.77E+04        | -6.47E-03          | -6.49E-03                                 | -7.95E-03        |
| Land use                                | -2.58E+00                | -2.62E+00                                 | -3.31E+00        | -4.18E-04          | -4.24E-04                                 | -5.36E-04        |
| Mineral resource scarcity               | -8.58E-02                | -8.82E-02                                 | -1.20E-01        | -7.14E-07          | -7.34E-07                                 | -1.00E-06        |
| Fossil resource scarcity                | -7.42E+01                | -7.62E+01                                 | -9.95E+01        | -7.57E-02          | -7.77E-02                                 | -1.02E-01        |
| Water consumption                       | -7.14E-01                | -7.30E-01                                 | -9.29E-01        | -2.68E-03          | -2.74E-03                                 | -3.48E-03        |
